# Supplementary material
Source: ML conference proceedings conference paper supplement (https://openreview.net/forum?id=2LfZDy2Ldo)
Supplement: supplementary_material [file Appendix.pdf › Supplementary_Materials/Appendix.pdf]

## 547 A. More Related Works

548 **Unsupervised Domain Adaptation.** UDA  
 549 aims to tackle the challenge of generaliz-  
 550 ing a model trained on a large number of  
 551 labeled samples from the source domain  
 552 to the target domain. UDA has been ex-  
 553 tensively explored for many practical ap-  
 554 plications, including image classification  
 555 [39–41], semantic segmentation [42–44],  
 556 object detection [45–47], and time series  
 557 forecasting [48–50]. However, UDA meth-  
 558 ods assume that both the labeled source  
 559 domain and the unlabeled target domain  
 560 are available at the same time, which is  
 561 not available in some scenarios where the  
 562 source domain data cannot be accessed dur-  
 563 ing training due to privacy-preserving poli-  
 564 cies.

565 **Source-free Domain Adaptation (White-**  
 566 **box Predictors).** Compared to the UDA  
 567 setting, SFDA has higher privacy protec-  
 568 tion because it does not need to touch any  
 569 source data. Many SFDA methods have  
 570 been proposed recently [6–8, 51], which  
 571 only require access to unlabeled target  
 572 data and a trained source domain model  
 573 during training. Most existing research  
 574 on SFDA tasks is mainly based on self-  
 575 training [6, 8, 51], class prototypes [8, 52],  
 576 contrastive learning [7, 53], and generative  
 577 models [54, 25]. Although the SFDA task  
 578 has contributed to the mitigation of privacy  
 579 protection issues to some extent, recent re-  
 580 search [12] has found that exposing the  
 581 details of the white-box predictive model  
 582 training is quite dangerous due to certain  
 583 reverse generation techniques like [9, 10].

584 **Setting Comparison and Method Im-**  
 585 **provement.** As shown in Figure 6, the  
 586 respective processes and the differences  
 587 among UDA, SFDA, and DABP are pre-  
 588 sented. Compared with SFDA, DABP pro-  
 589 vides better data privacy protection with  
 590 more flexible portability, which only needs  
 591 to upload target data to the cloud API and  
 592 then download predictions before training.  
 593 Figure 7 illustrates the advantages of CVH-  
 594 TDN and the differences from previous  
 595 DABP methods. Different from the pre-  
 596 vious DABP methods [11–14, 31], CVH-  
 597 TDN leverages sample spatial similarity  
 598 instead of suppressing targeted sample in-  
 599 formation, thereby improving model generalization and class discrimination.

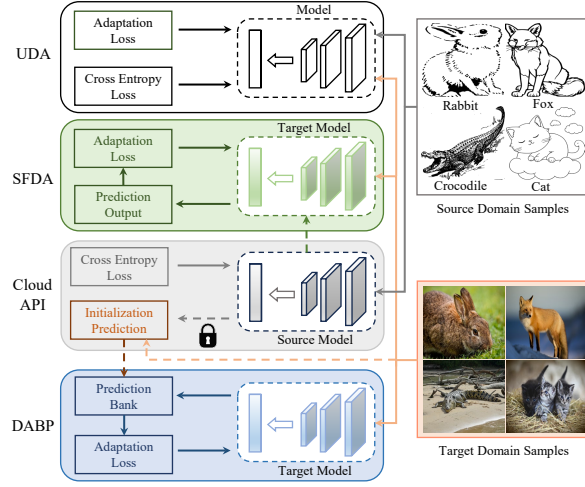

Figure 6: Illustration of the differences among UDA, SFDA, and DABP. The dotted lines in the figure indicate the operations performed by the cloud API with the source model under different settings. SFDA requires the entire source model to be obtained from the cloud API before training. DABP outperforms SFDA in data privacy protection and portability, simply requiring uploading target data to the cloud API and then downloading predictions before training.

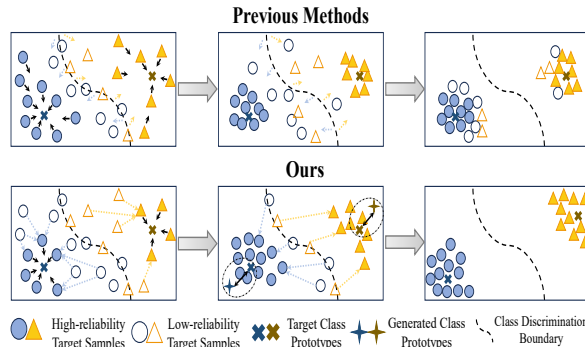

Figure 7: Comparison between existing DABP methods and CVH-TDN. Top: Existing DABP methods focus on learning high-reliability knowledge and force low-reliability sample aggregation. Bottom: CVH-TDN proposes hallucination alignment to investigate the spatial connection between samples and hallucinations and introduces hallucination calibration to explore relationships among spatially similar samples. Our algorithm enhances the capabilities of model generalization and class discrimination.

## B. Theoretical Analysis

We provide theoretical justifications grounded in the generalization bound of reasoning to clarify the working mechanism of our algorithm.

Since our algorithm is trained in an unlabeled target domain and generates the controlled samples based on our hallucination generation, we denote  $x \sim D_T$  as the real sample distribution of the target domain. Based on the existing theories [55], the error of CVH-TDN can be formulated as a convex combination of the errors of the reliable subdomain  $x_R \sim D_R$ , the unreliable subdomain  $x_{UR} \sim D_{UR}$ , and the generated subdomain  $x_G \sim D_G$  that represents the generated sample distribution of the reliable subdomain. And denote  $y_R, y_{UR}$  and  $\hat{y}_R, \hat{y}_{UR}$  as the true labels and the predicted labels of  $x_R$  and  $x_{UR}$ , respectively. Denote  $y_G$  as the true label and  $\hat{y}_G$  as the predicted label of  $x_G$ .  $y_T$  and  $\hat{y}_T$  are the true labels and the predicted labels of target domain,  $y_G = y_R, y_T = y_R + y_{UR}$ , and  $\hat{y}_T = \hat{y}_R + \hat{y}_{UR}$ . Let  $H$  denote a hypothesis, which can be expressed as:

$$\epsilon_R(H, \hat{y}_R) \leq \epsilon_G(H, \hat{y}_G) + d_{n\Delta n}(D_R, D_G) + \epsilon_G, \quad (19)$$

$$\epsilon_{\hat{T}}(H, \hat{y}_T) = \alpha \epsilon_R(H, \hat{y}_R) + (1 - \alpha) \epsilon_{UR}(H, \hat{y}_{UR}), \quad (20)$$

$$\epsilon_T(H, y_T) = \alpha \epsilon_R(H, y_R) + (1 - \alpha) \epsilon_{UR}(H, y_{UR}), \quad (21)$$

where  $d_{n\Delta n}(D_R, D_G) = 2 \sup_{H, H' \in \mathcal{H}} |\mathbb{E}_{x_R \sim D_R} [H(x_R) \neq H'(x_R)] - \mathbb{E}_{x_G \sim D_G} [H(x_G) \neq H'(x_G)]|$ ;  $\epsilon_G(H, \hat{y}_G)$  is the expected error of the generated sample distribution;  $\epsilon_G = \min(\epsilon_R(H, \hat{y}_R) + \epsilon_G(H, \hat{y}_G))$ ;  $\epsilon_R(H, \hat{y}_R)$  is the expected error of the reliable subdomain;  $\alpha$  is the trade-off parameter that is controlled by  $\lambda$  in Eq. (7);  $\epsilon_{UR}(H, \hat{y}_{UR})$  is the expected error of the unreliable subdomain;  $\epsilon_R(H, y_R)$  and  $\epsilon_{UR}(H, y_{UR})$  denote the oracle errors of reliable and unreliable samples, respectively.

For  $\epsilon_R(H, \hat{y}_R) \leq \epsilon_G(H, \hat{y}_G) + d_{n\Delta n}(D_R, D_G) + \epsilon_G$ , we analyze each component in detail in this paragraph:

(1)  $\epsilon_G(H, \hat{y}_G)$  is the expected error of the generated sample distribution, which can be minimized with a cross-entropy loss in the former term of Eq. (15). With the guidance of the black-box predictors, in the initial stage of training, the distribution of the reliable samples selected by the target model in the feature space is relatively close to that of the samples in the source domain. We can obtain good training results for these samples with similar features through the black-box predictors. As the training progresses, the model gradually adapts to the distribution of the target domain. the target model continuously selects more reliable samples. Thus,  $D_G$  can better learn the knowledge of these reliable samples through Eq. (15), and align the distribution of the target features through Eq. (12), so as to continuously adapt to the target domain. Therefore,  $\epsilon_G(H, \hat{y}_G)$  is small in the whole training.

(2)  $\epsilon_G$  is the shared error of the ideal joint hypothesis which is considered to be a sufficiently small constant to represent the complexity of the generated sample hypothesis space.

(3)  $d_{n\Delta n}(D_R, D_G)$  depends on the expected error of the disagreement between two hypothesis on the reliable subdomain and the generated sample distribution of the reliable subdomain. In the early stages of training, it is easy to find two hypotheses that both  $H$  and  $H'$  correctly predict the reliable samples. As the training progresses, hallucination alignment explores the spatial relationship between the samples and the hallucinations generated by hallucination generation through bidirectional alignment to encourage clustering of samples with similar features. Hallucination alignment helps to maintain the discrimination and generalization ability of the model in the target domain. Therefore,  $\mathbb{E}_{x_G \sim D_G} [H(x_G) \neq H'(x_G)]$  is always small during adaptation phase. Hallucination calibration uses a hierarchical way to aggregate samples with similar signature features and separates ambiguous samples with common features. Hallucination calibration helps to improve model reasoning ability and prevent reliable sample overfitting. The joint learning of hallucination alignment and hallucination calibration is conducted on reliable samples. As a result,  $\mathbb{E}_{x_R \sim D_R} [H(x_R) \neq H'(x_R)]$  always maintaining a small value during adaptation phase.

Then, during the transition from the early stage to the middle stage of adaptation, we derive an upper bound of how the error  $\epsilon_{\hat{T}}(H, \hat{y}_R)$  is close to  $\epsilon_T(H, y_T)$  though hallucination calibration, which is the oracle error with the truth label  $y_t$  of the target domain.

**Theorem 1.** Let  $H$  be a hypothesis in class  $n$ , we have:

$$\begin{aligned}
|\epsilon_{\hat{T}}(H, \hat{y}_T) - \epsilon_T(H, y_T)| &= \left| \alpha \epsilon_R(H, \hat{y}_R) + (1 - \alpha) \epsilon_{UR}(H, \hat{y}_{UR}) \right. \\
&\quad \left. - \alpha \epsilon_R(H, y_R) - (1 - \alpha) \epsilon_{UR}(H, y_{UR}) \right| \\
&\leq \alpha (|\epsilon_R(H, y_R) - \epsilon_{UR}(H, y_{UR})| + |\epsilon_R(H, \hat{y}_R) - \epsilon_{UR}(H, \hat{y}_{UR})|) \\
&\quad + |\epsilon_{UR}(H, \hat{y}_{UR}) - \epsilon_{UR}(H, y_{UR})| \\
&\leq \alpha (d_{n\Delta n}(D_R, D_{UR}) + \varepsilon + \hat{\varepsilon}) + \rho_{UR}, \tag{22}
\end{aligned}$$

where the ideal risk in this hypothesis  $H$  is the combinatorial error of the ideal joint hypothesis  $\varepsilon = \epsilon_R(H^*, y_R) + \epsilon_{UR}(H^*, y_{UR})$  with  $H^* = \arg \min_H (\epsilon_R(H, y_R) + \epsilon_{UR}(H, y_{UR}))$ ;  $\hat{\varepsilon} = \epsilon_R(H^*, \hat{y}_R) + \epsilon_{UR}(H^*, \hat{y}_{UR})$  is the predicted risk; the distribution discrepancy between reliable and unreliable subdomains is  $d_{n\Delta n}(D_R, D_{UR}) = 2 \sup_{H, H' \in \mathcal{H}} |\mathbb{E}_{x_R \sim D_R} [H(x_R) \neq H'(x_R)] - \mathbb{E}_{x_{UR} \sim D_{UR}} [H(x_{UR}) \neq H'(x_{UR})]|$ ; and  $\rho_{UR}$  is the predicted label rate of  $\hat{y}_{UR}$ ,  $\rho_{UR} = \epsilon_{UR}(\hat{y}_{UR}, y_{UR})$ . Then, we set  $\epsilon_1 = |\epsilon_R(H, y_R) - \epsilon_{UR}(H, y_{UR})|$ ,  $\epsilon_2 = |\epsilon_R(H, \hat{y}_R) - \epsilon_{UR}(H, \hat{y}_{UR})|$ , and  $\epsilon_3 = |\epsilon_{UR}(H, \hat{y}_{UR}) - \epsilon_{UR}(H, y_{UR})|$ , making  $|\epsilon_{\hat{T}}(H, \hat{y}_T) - \epsilon_T(H, y_T)| \leq \alpha(\epsilon_1 + \epsilon_2) + \epsilon_3$ . By applying the triangle inequality for classification errors [56] as presented in **Lemma 1**, we can prove the upper bound of  $\epsilon_1$ ,  $\epsilon_2$ , and  $\epsilon_3$ .

**Lemma 1.** For any hypotheses  $H_1, H_2$ , and  $H_3$  in class  $\mathcal{H}$ ,

$$\epsilon(H_1, H_2) \leq \epsilon(H_1, H_3) + \epsilon(H_2, H_3). \tag{23}$$

Therefore, for  $\epsilon_1$ , we can prove that:

$$\begin{aligned}
\epsilon_1 &= |\epsilon_R(H, y_R) - \epsilon_{UR}(H, y_{UR})| \\
&\leq |\epsilon_R(H, y_R) - \epsilon_R(H, H^*)| + |\epsilon_{UR}(H, H^*) - \epsilon_{UR}(H, y_{UR})| + |\epsilon_R(H, H^*) - \epsilon_{UR}(H, H^*)| \\
&\leq \epsilon_R(H^*, y_{UR}) + \epsilon_{UR}(H^*, y_{UR}) + |\epsilon_R(H, H^*) - \epsilon_{UR}(H, H^*)| \\
&\leq \frac{1}{2} d_{n\Delta n}(D_R, D_{UR}) + \varepsilon \tag{24}
\end{aligned}$$

Similarly, for  $\epsilon_2$ ,

$$\begin{aligned}
\epsilon_2 &= |\epsilon_R(H, \hat{y}_R) - \epsilon_{UR}(H, \hat{y}_{UR})| \\
&\leq |\epsilon_R(H, \hat{y}_R) - \epsilon_R(H, H^*)| + |\epsilon_{UR}(H, H^*) - \epsilon_{UR}(H, \hat{y}_{UR})| + |\epsilon_R(H, H^*) - \epsilon_{UR}(H, H^*)| \\
&\leq \epsilon_R(H^*, \hat{y}_R) + \epsilon_{UR}(H^*, \hat{y}_{UR}) + |\epsilon_R(H, H^*) - \epsilon_{UR}(H, H^*)| \\
&\leq \frac{1}{2} d_{n\Delta n}(D_R, D_{UR}) + \epsilon_R(H^*, \hat{y}_R) + \epsilon_{UR}(H^*, \hat{y}_{UR}) \\
&\leq \frac{1}{2} d_{n\Delta n}(D_R, D_{UR}) + \hat{\varepsilon}. \tag{25}
\end{aligned}$$

For  $\epsilon_3$ ,

$$\epsilon_3 = |\epsilon_{UR}(H, \hat{y}_{UR}) - \epsilon_{UR}(H, y_{UR})| \leq \epsilon_{UR}(\hat{y}_{UR}, y_{UR}) = \rho_{UR}. \tag{26}$$

By proving  $\epsilon_1$ ,  $\epsilon_2$ , and  $\epsilon_3$ , we can derive **Theorem 1**,

$$\begin{aligned}
|\epsilon_{\hat{T}}(H, \hat{y}_T) - \epsilon_T(H, y_T)| &\leq \alpha(\epsilon_1 + \epsilon_2) + \epsilon_3 \\
&\leq \alpha \left( \frac{1}{2} d_{n\Delta n}(D_R, D_{UR}) + \varepsilon \right) + \alpha \left( \frac{1}{2} d_{n\Delta n}(D_R, D_{UR}) + \hat{\varepsilon} \right) + \rho_{UR} \\
&= \alpha (d_{n\Delta n}(D_R, D_{UR}) + \varepsilon + \hat{\varepsilon}) + \rho_{UR}. \tag{27}
\end{aligned}$$

when the reliable subdomain is mostly correct,  $y_R$  and  $\hat{y}_R$  are extremely similar with the ideal risk  $\varepsilon$  that is negligibly small [57], in which case  $\rho_R \approx 0$ ,  $\hat{\varepsilon}$  is bounded by the predicted label rate of unreliable subdomain  $\rho_{UR}$ . Empirical results demonstrate that  $d_{n\Delta n}(D_R, D_{UR})$  is usually small across the two subdomains, which plays a significant role in tightening the upper bound though hallucination calibration. Therefore, our method can theoretically reduce the expected error of the model on the target domain.

## C. Algorithm Details

The whole training process is shown in Algorithm 1. In addition, the experimental code and the main code are available in the Supplementary Materials.

---

**Algorithm 1** CVH-TDN for DABP task.

---

**Input:** Target samples  $D_t = \{(x_i)\}_{i=1}^{N_t}$ , black-box hard predictions  $P_s$ , and training model  $\mathcal{M}_\theta \in \{F, C\}$ ;

**Parameter:** The model parameter  $\theta$  and the hyperparameters  $\lambda, \mu, \tilde{\mu}_s, \phi$ , and  $r$ ;

- 1: **Initialize:**  $\mathcal{M}_\theta$  simple tests on  $D_t$  to initialize  $\theta$  and memory storage  $M$ ; initialize smooth adaptive storage  $S$  with  $P_s$  and  $\tilde{\mu}$  (determined by  $\tilde{\mu}_s$  and  $\mu$ );
  - 2: **while** Adaptation **do**
  - 3:   Get sample batch  $B$  using  $\mathcal{M}_\theta$  from  $D_t$ ;
  - 4:   **Hallucination Generation:**
  - 5:   Control hallucination image  $x_i^g$  generated by  $F$  evaluating  $x_i$  in  $B$  using Eqs. (1)-(4).
  - 6:   **Hallucination Alignment:**
  - 7:   Dynamic divide the samples according to their reliability using Eqs. (6)-(8);
  - 8:   Update  $M$  using Eq. (5) to extract the latest information;
  - 9:   Calculate bidirectional alignment weights  $w$  using Eq. (9).
  - 10:   **Hallucination Calibration:**
  - 11:   Update  $S$  and  $\tilde{\mu}$  using Eq. (13) to mimic the brain cognitive processes;
  - 12:   Retrieve  $M$  to explore the relationship between features and space and calculate the spatial similarity.
  - 13:   **Model Training:**
  - 14:   Optimize target model  $\mathcal{M}_\theta$  by minimizing Eq. (18).
  - 15: **end while**
- 

Table 6: Accuracies (%) on the *DomainNet* using the ResNet-50 backbone. The rows represent the source domain and the columns represent the adapted target domain.

| ResNet | clp  | inf  | pnt  | qdr  | rel  | skt  | Mean |  | DINE | clp  | inf  | pnt  | qdr  | rel  | skt  | Mean |
|--------|------|------|------|------|------|------|------|--|------|------|------|------|------|------|------|------|
| clp    | —    | 16.5 | 36.0 | 10.1 | 52.8 | 41.8 | 31.4 |  | clp  | —    | 12.1 | 29.6 | 11.1 | 60.4 | 37.3 | 29.4 |
| inf    | 32.1 | —    | 32.0 | 2.7  | 47.4 | 26.4 | 28.1 |  | inf  | 29.5 | —    | 37.6 | 3.4  | 53.8 | 26.5 | 30.1 |
| pnt    | 29.6 | 23.2 | —    | 4.9  | 36.7 | 27.8 | 24.4 |  | pnt  | 37.3 | 12.9 | —    | 4.2  | 60.5 | 34.7 | 29.9 |
| qdr    | 11.2 | 1.1  | 1.9  | —    | 4.3  | 7.7  | 5.3  |  | qdr  | 9.4  | 0.7  | 3    | —    | 8.3  | 6.6  | 5.6  |
| rel    | 48.2 | 19.6 | 47.9 | 4.3  | —    | 35.6 | 31.1 |  | rel  | 45.1 | 14.4 | 49.7 | 5.5  | —    | 35.0 | 29.9 |
| skt    | 49.1 | 13.5 | 35.5 | 11.5 | 47.1 | —    | 31.3 |  | skt  | 43.3 | 10.0 | 39.3 | 11.6 | 57.2 | —    | 32.2 |
| Mean   | 34.0 | 14.8 | 30.7 | 6.7  | 37.7 | 27.9 | 25.3 |  | Mean | 32.9 | 10.0 | 31.8 | 7.2  | 48.0 | 28.0 | 26.2 |

  

| BETA | clp  | inf  | pnt  | qdr  | rel  | skt  | Mean |  | CVH-TDN | clp  | inf  | pnt  | qdr  | rel  | skt  | Mean        |
|------|------|------|------|------|------|------|------|--|---------|------|------|------|------|------|------|-------------|
| clp  | —    | 13.4 | 41.2 | 13.0 | 61.8 | 41.1 | 34.1 |  | clp     | —    | 19.0 | 41.8 | 11.3 | 57.2 | 42.7 | 34.4        |
| inf  | 34.9 | —    | 41.6 | 3.7  | 56.8 | 30.7 | 33.6 |  | inf     | 37.8 | —    | 39.9 | 2.9  | 53.5 | 32.1 | 33.2        |
| pnt  | 47.3 | 18.4 | —    | 3.2  | 62.5 | 41.9 | 34.7 |  | pnt     | 45.2 | 18.9 | —    | 4.0  | 60.3 | 37.9 | 33.3        |
| qdr  | 11.7 | 0.9  | 2.1  | —    | 9.1  | 8.1  | 6.4  |  | qdr     | 15.0 | 0.9  | 2.9  | —    | 6.0  | 11.1 | 7.2         |
| rel  | 46.5 | 15.8 | 50.9 | 5.6  | —    | 37.7 | 31.3 |  | rel     | 52.7 | 21.7 | 52.5 | 5.7  | —    | 39.2 | 34.4        |
| skt  | 47.3 | 12.3 | 42.3 | 14.8 | 59.9 | —    | 35.3 |  | skt     | 54.1 | 17.3 | 44.3 | 12.4 | 54.3 | —    | 36.5        |
| Mean | 37.5 | 12.2 | 35.6 | 8.1  | 50.0 | 31.9 | 28.2 |  | Mean    | 41.0 | 15.6 | 36.3 | 7.3  | 46.3 | 32.6 | <b>29.8</b> |

## D. Specific Dataset Details

Four standard benchmark datasets are used for evaluating our method and comparison, including *Office-31* [27], *Office-Home* [28], *VisDA-17* [29], and *DomainNet* [30]. *Office-31* is a small-scale benchmark dataset, which contains 4,110 images with 31 categories from 3 domains, Amazon (A), Dslr (D), and Webcam (W). *Office-Home* is a widely used medium-scale benchmark that contains a total of 15.5K images with 65 categories from 4 distinct domains, Real World (R), Clipart (C), Art (A), and Product (P). *VisDA-17* is a challenging large-scale benchmark with 12 categories that include 152k synthetic source domain images and 55k target images of real objects, presenting a greater challenge due to a large synthetic-to-real domain gap. *DomainNet* is the largest domain adaptation benchmark dataset, which consists of about 600K with 345 categories across 6 domains: Clipart (clp), Infograph (inf), Painting (pnt), Quickdraw (qdr), Real (rel), and Sketch (skt).

## E. Additional Dataset *DomainNet*

For the *DomainNet* dataset, we compare our algorithm with previous SOTA methods [11, 13] under the ResNet-50 backbone. As shown in Table 6, compared with other algorithms, CVH-TDN achieves the highest average accuracy of 29.8% on the *DomainNet*, which is full of on-hard tasks (whose source-only accuracies are below 65%). These results demonstrate that, in the on-hard tasks, our

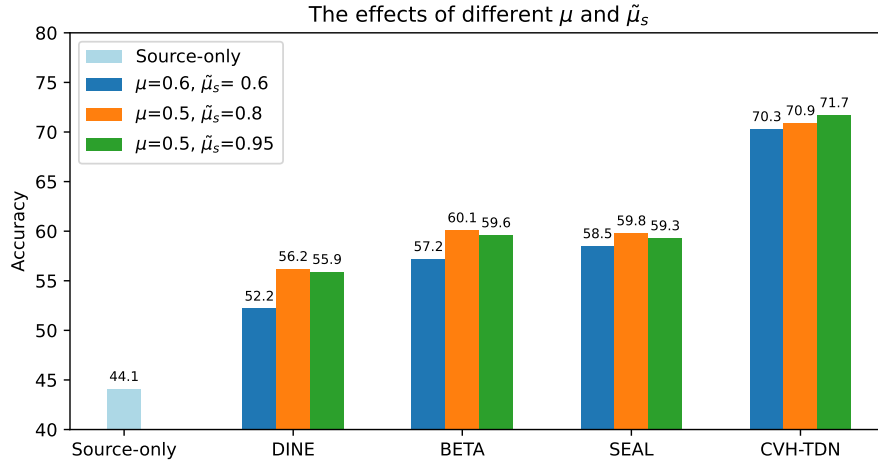

Figure 8: The effect display of different  $\mu$  and  $\tilde{\mu}_s$  in the  $A \rightarrow C$  subtask of the *Office-Home*. Each result is reported when the best accuracy is achieved.

spatial exploration method based on hallucination control is more effective than methods that rely on suppressing specific sample information.

## F. More Parameter Analysis and Motivation Demonstration

As shown in Figure 8, we report the performance of different methods [11, 13, 31] under various conditions of  $\mu$  and  $\tilde{\mu}_s$  on the *Office-Home*. In the brain cognitive processes [58], when humans encounter something they have never seen before, their brain cognition is primarily influenced by external information, with a small portion derived from their own understanding. And as their understanding deepens, they can balance the weight of external information and their own understanding, increasingly trusting their own understanding of the matter. In this work, we mimic the brain cognitive process to improve the learning and updating process of Eq. (13), where  $\tilde{\mu}_s$  simulates the initial external information and  $\mu$  simulates human understanding. Additionally, when  $\mu = \tilde{\mu}_s = 0.6$ , it indicates the use of the previously common adaptive label smoothing update [11] instead of our update strategy. Experimental results show that this improvement significantly enhances the compared DABP methods.

Moreover, we conducted further analytical experiments to demonstrate the advantage of our method for more effectively leveraging both reliable and unreliable samples compared to existing approaches. First, we elaborate on some concepts: the higher the model prediction accuracy of a class, the higher the proportion of reliable samples in that class. Meanwhile, the samples exhibiting features that clearly distinguish their class tend to have a higher probability of being reliable. Because different methods have different strategies for discriminating reliability, we have selected sample instances with consistent initial reliability judgments between BETA [13] and SEAL [31]. Specifically, in Figure 9, the classes corresponding to high-reliability samples are: Bus, Skateboard, and Person; and the classes corresponding to low-reliability samples are: Car, Motorcycle, and Truck.

As shown in Figure 9, the samples corresponding to the classes of Bus and Skateboard were consistently regarded as reliable samples during the training of BETA and SEAL. They focus on learning from these reliability samples, and Figure 9 demonstrates that they effectively concentrate and lock the feature regions of interest on the salient features. Meanwhile, some low-reliability samples (corresponding to the class Car) have also been correctly rectified from the wrong judgments of the black-box predictors through high sample knowledge. However, for some low-reliability samples (corresponding to the class Motorcycle and Truck), the previous methods all failed: BETA didn't lock onto the effective features, and SEAL mistakenly locked onto the features of other classes. In addition, SEAL even misjudged some samples that were judged as high-reliability samples (corresponding to the class Person) as belonging to other classes. These observations are sufficient to show the limitations of using high-reliability samples to constrain the attention-locked area. Moreover, the

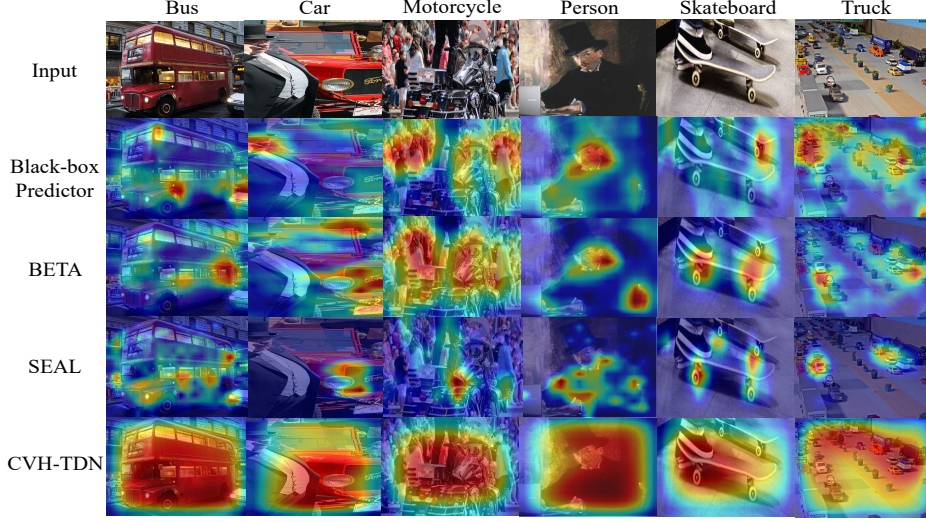

Figure 9: The visualization results of the heat map on the *VisDA-17*. The redder the area, the higher the model’s level of attention.

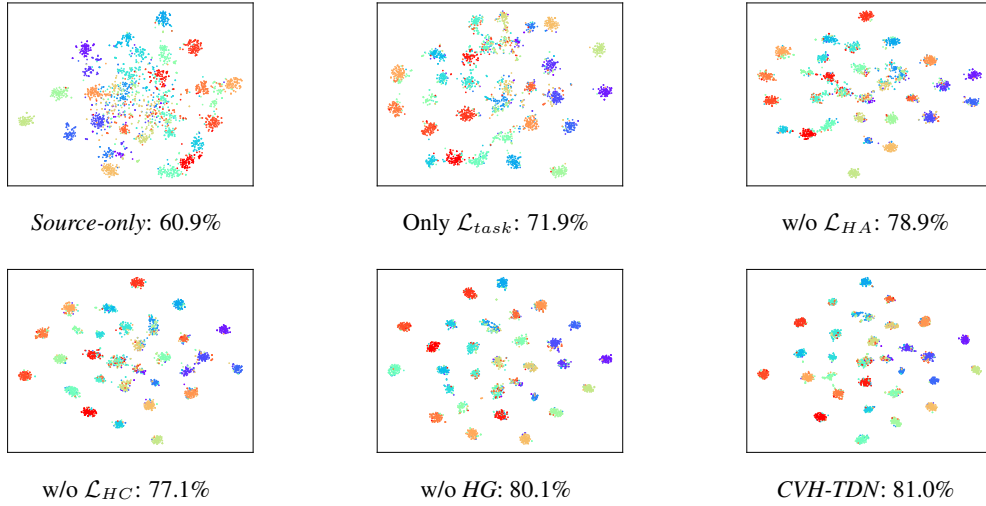

Figure 10: The ablation visualizations of the feature distribution in the  $W \rightarrow A$  subtask of the *Office-31* using t-SNE [18]. Herein, the points represent target samples and the different colors correspond to their true classifications.

feature visualization of Figure 1 can also serve as evidence for the inadequacy of their clustering ability.

In our method, driven by the hallucination alignment, all type- $UR$  samples will become samples of type  $R$  in the middle of training. We conceptually blurred the distinction between high-reliability and low-reliability samples during the learning process: samples are no longer constrained by high- or low-reliability ones. As shown in Figures 4 and 9, CVH-TDN enhances the model’s reasoning ability by expanding the coverage area of the model’s region of interest through hallucination generation and hallucination alignment, resulting in more effective use of all samples.

## G. More Ablation Visualization and Experimental Comparison

In Figure 10, we present the t-SNE visualizations [18] of the ablation study on the *Office-31*. Experimental results show that each component of our method improves the discrimination capacity of classes. It is worth noting that, in the small-scale dataset *Office-31*, the impact of removing HG

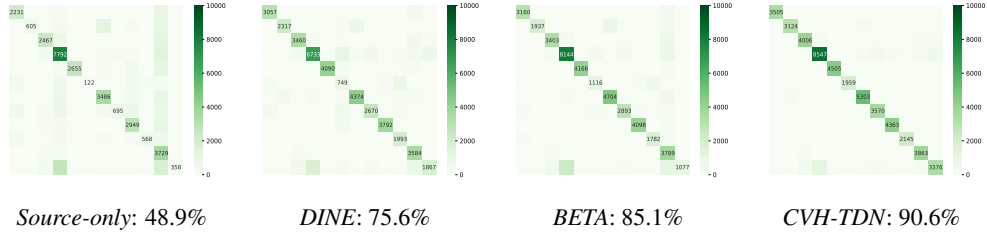

Figure 11: Classification visualization with Confusion Matrix to compare different methods on the *VisDA-17*. (Zooming in for a clear view)

Table 7: Results of cost comparison on the *VisDA-17* with the ResNet-101 backbone.

| Method  | Time (s/epoch) | Space (MiB) | Accuracy (%) |
|---------|----------------|-------------|--------------|
| DINE    | 124s           | 9881MiB     | 75.6         |
| BETA    | 1101s          | 20247MiB    | 85.1         |
| SEAL    | -              | Over 24G    | 89.2         |
| CVH-TDN | 205s           | 10589MiB    | 90.6         |

or  $\mathcal{L}_{HA}$  is not as significant as shown in the heatmap visualizations [38] of the large-scale dataset *VisDA-17* in Figure 4. This indicates that in datasets with small domain gaps, an efficient clustering algorithm is more important than an algorithm designed to prevent model overfitting, while the opposite holds for datasets with large domain gaps. Furthermore,  $\mathcal{L}_{HA}$  focuses on enhancing the model reasoning ability, while  $\mathcal{L}_{HC}$  emphasizes improving the class discrimination ability.

For a fair comparison, we set the same running conditions (*e.g.*, batch size = 64, num workers = 4, *etc.*) in the compared works on a machine with an NVIDIA GeForce RTX4090 GPU. Figure 11 shows the Confusion Matrix visualization, in which our method consistently outperforms in discriminating target samples of each class on the *VisDA-17*. This demonstrates that exploring the spatial relationships among samples by controlling hallucinations is more effective in improving class discrimination ability than suppressing specific sample information.

In Table 7, we record the average runtime cost, the maximum GPU space usage, and the best accuracy of each comparison method. When adapting *VisDA-17*, it is worth noting that BETA [13] is divided into two stages that are highly computationally intensive: the first stage is the initialization, which requires initialization of the two models due to their mutually-distilled network structures; the second stage is the two-step process, which requires distillation and fine-tuning for each epoch. SEAL [31] is highly resource-intensive, and its official code cannot complete the adaptation task on *VisDA-17* under the same conditions with 24GB GPU memory. Compared to other methods, CVH-TDN calculates the model area of interest and generates attention-specific masking blocks with minimal cost, which does not require fine-tuning or a computationally expensive generation network.

To ensure robustness, we report the performances across multiple runs with different random seed initializations. As shown in Table 8, we maintained a small average accuracy gap (0.4%) among different seeds, reflecting the stability and superiority of our method.

Table 8: Results under different random seeds on the *Office-Home* with the ResNet-50 backbone.

| Seed | A→C  | A→P  | A→R  | C→A  | C→P  | C→R  | P→A  | P→C  | P→R  | R→A  | R→C  | R→P  | Mean |
|------|------|------|------|------|------|------|------|------|------|------|------|------|------|
| 2022 | 71.7 | 88.4 | 83.6 | 70.1 | 86.7 | 82.8 | 70.8 | 69.2 | 83.3 | 74.7 | 74.2 | 91.6 | 78.9 |
| 2023 | 72.2 | 89.3 | 83.7 | 69.9 | 87.7 | 82.9 | 69.6 | 68.7 | 83.3 | 74.9 | 73.8 | 91.6 | 79.0 |
| 2024 | 71.7 | 88.7 | 83.3 | 69.7 | 86.1 | 83.3 | 70.2 | 68.9 | 83.7 | 73.8 | 72.6 | 91.3 | 78.6 |
| 2025 | 72.1 | 88.6 | 83.5 | 70.0 | 87.9 | 82.4 | 70.1 | 67.2 | 83.7 | 75.4 | 72.1 | 91.4 | 78.7 |

## 758 **H. Broader Impacts and Limitations**

759 Our work CVH-TDN focuses on the problem of Domain Adaptation of Black-Box Predictors (DABP),  
760 which provides better data privacy protection with more flexible portability compared with other DA  
761 settings. Inspired by research in pathology and neuroscience, CVH-TDN is specifically designed  
762 for the DABP classification task. While its effectiveness has been demonstrated through extensive  
763 experiments and its theoretical soundness established, its applicability to other tasks remains an open  
764 question. Therefore, we plan to further explore the practical utility of this algorithm in a broader  
765 range of task scenarios.
